# Supplementary material for: 乳児骨形成不全症に対する pamidronate 治療
Source: Royal Society of Chemistry journal article supplement (doi:10.1039/b111355k), 2003-09-20
Supplement: b111355k.doc [file b111355k.doc]

# Supplementary data

**General experimental procedure:** The arylboronic acid (1.1 mmol), Pd(PPh3)4 (3% mmol), Cu2O (3% mmol), base (3.3 mmol), and ethyl bromoacetate (1.0 mmol) were placed in a flask under argon atmosphere, then degassed toluene (4 ml) was added; the reaction mixture was stirred at 80C and monitored by TLC. After the reaction completed, the reaction mixture was cooled to room temperature and 10 ml of water was added. The mixture then extracted with ether (3 × 20 ml). The combined organic layer was washed with brine (2 × 10 ml) and dried over MgSO4. Removal of solvent in *vacuo*, followed by silica gel chromatography (10% ethyl acetate in petroleum) gave the corresponding ethyl arylacetate 2**a** ~ 2**i**.

**Ethyl phenylacetate** (**2a**). elemental analysis calcd for C10H12O2 (%):C 73.15, H 7.37; found: C 73.07, H 7.25; 1H NMR (300 MHz, CDCl3, 25 ºC, TMS):  = 1.22-1.16 (t, 3H), 3.55 (s, 2H), 4.12-4.05 (q, 2H), 7.29-7.19 (m, 5H); IR: *v* = 2983, 1737, 1254, 1159, 1030, 697 cm-1; MS: *m/z*(%): 164 (21) [M+], 91 (100).

**Ethyl 2-methyl-phenylacetate** (**2b**). elemental analysis calcd for C11H14O2 (%):C 74.13, H 7.92; found: C 74.17, H 8.01; 1H NMR (300 MHz, CDCl3, 25 ºC, TMS):  = 1.26-1.21 (t, 3H), 2.31 (s, 3H), 3.62 (s, 2H), 4.17-4.10 (q, 2H), 7.20-7.15 (m, 4H); IR: *v* = 2982, 1736, 1253, 1156, 1032, 746 cm-1; MS:(*m/z*)(%): 178(20) [M+], 132 (15), 105 (100).

**Ethyl 3-methyl-phenylacetate** (**2c**). elemental analysis calcd for C11H14O2 (%):C 74.13, H 7.92; found: C 74.21, H 7.63; 1H NMR (300 MHz, CDCl3, 25 ºC, TMS):  = 1.28-1.23 (t, 3H), 2.34 (s, 3H), 3.58 (s, 2H), 4.19-4.12 (q, 2H), 7.26-7.07 (m, 4H); IR: *v* = 2982, 1737, 1253, 1156, 1032, 746 cm-1; MS:(*m/z*)(%): 178(99) [M+], 105 (100).

**Ethyl 4-methyl-phenylacetate** (**2d**). elemental analysis calcd for C11H14O2 (%):C 74.13, H 7.92; found: C 73.10, H 7.80; 1H NMR (300 MHz, CDCl3, 25 ºC, TMS):  = 1.27-1.23 (t, 3H), 2.33 (s, 3H), 3.57 (s, 2H), 4.18-4.11 (q, 2H), 7.26-7.12 (m, 4H); IR: *v* = 2983, 1737, 1254, 1159, 1030, 746 cm-1; MS:(*m/z*)(%): 178(100) [M+], 105 (100).

**Ethyl 2-methoxyl-phenylacetate** (**2e**). elemental analysis calcd for C11H14O3 (%): C 68.02, H 7.26; found: C 67.94, H 7.21; 1H NMR (300 MHz, CDCl3, 25 ºC, TMS):  = 1.27-1.22 (t, 3H), 3.62 (s, 2H), 3.81 (s, 3H), 4.19-4.12 (q, 2H), 6.94-6.86 (m, 2H), 7.25-7.17 (m, 2H); IR: *v* = 2982, 1738, 1497, 1249, 1156, 1031, 755 cm-1; MS:(*m/z*)(%):194(46) [M+], 121 (100), 91 (77).

**Ethyl 4-methoxyl-phenylacetate** (**2f**). elemental analysis calcd for C11H14O3 (%):C 68.02, H 7.26; found: C 68.33, H 7.27; 1H NMR (300 MHz, CDCl3, 25 ºC, TMS):  = 1.26-1.22 (t, 3H), 3.54 (s, 2H), 3.78 (s, 3H), 4.17-4.10 (q, 2H), 6.88-6.84 (m, 2H), 7.21-7.18 (m, 2H); IR: *v* = 2982, 1739, 1497, 1249, 1156, 1031, 755 cm-1; MS:(*m/z*)(%): 194(43) [M+], 121 (100), 91 (82).

**Ethyl 1-naphthylacetate** (**2g**). elemental analysis calcd for C14H14O2 (%): C 78.48, H 6.58; found: C 78.44, H 6.39; 1H NMR (300 MHz, CDCl3, 25 ºC, TMS):  = 1.24-1.18 (t, 3H), 4.04 (s, 2H,), 4.17-4.10 (q, 2H), 7.52-7.40 (m, 4H), 8.01-7.76 (m, 3H); IR: *v* = 2982, 1733, 1174, 1029, 780 cm-1; MS:(*m/z*)(%): 214(37) [M+], 141 (100).

**Ethyl 4-chloro-phenylacetate** (**2h**). elemental analysis calcd for C10H11ClO2 (%): C 60.46, H 5.58; found: C 60.24, H 5.64; 1H NMR (300 MHz, CDCl3, 25 ºC, TMS):  = 1.34-1.16 (t, 3H), 3.58 (s, 2H), 4.25-4.09 (q, 2H), 7.35-7.16 (m, 4H); IR: *v* = 2984, 1737, 1494, 1253, 1158, 807 cm-1; MS:(*m/z*)(%): 198 (24) [M+], 125 (100).

**Ethyl 4-trifluoromethyl-phenylacetate** (**2i**). elemental analysis calcd for C11H11F3O2 (%): C 56.90, H 4.77; found: C 57.39, H 4.89; 1H NMR (300 MHz, CDCl3, 25 ºC, TMS):  = 1.31 -1. 22 (t, 3H), 3.66 (s, 2H), 4.19-4.11 (q, 2H), 7.58-7.25 (m, 4H); IR: *v* = 1724, 1423, 1330, 1070, 887 cm-1; MS:(*m/z*)(%): 232 (7) [M+], 159 (100).
